# Supplementary material for: Association between KRAS and PIK3CA Mutations and Progesterone Resistance in Endometriotic Epithelial Cell Line
Source: MDPI journal article supplement (doi:10.3390/cimb46040224), 2024-04-19
Supplement: s1 [file s1]

Association between *KRAS* or *PIK3CA* mutations and progesterone resistance on endometriotic epithelial cell line.

Supplementary materials

Table S1. Description of primary antibodies

| Antibody                           | Manufacturer   | Clone No.          | Dilution | MW (kDa)                |
|------------------------------------|----------------|--------------------|----------|-------------------------|
| Progesterone Receptor A/B Antibody | Cell signaling | 3176 (product No.) | 1:1000   | 90 (PR-A)<br>118 (PR-B) |
| Progesterone Receptor B            | Cell signaling | C1A2               | 1:1000   | 118                     |
| GAPDH                              | Wako           | 5A12               | 1:1000   | 37                      |

Table S2. The primers used for real-time qPCR

| Gene           | Forward primer<br>(5' to 3') | Reverse primer<br>(3' to 5') |
|----------------|------------------------------|------------------------------|
| <i>COX-2</i>   | CGGTGAAACTCTGGCTAGACAG       | GCAAACCGTAGATGCTCAGGGA       |
| <i>mPGES-1</i> | GGAACGACATGGAGACCATCTAC      | TCCAG GCGACAAAAGGGTTA        |
| <i>IL-6</i>    | AGACAGCCACTCACCTCTTCAG       | TTCTGCCAGTGCCTCTTTGCTG       |
| <i>MCP-1</i>   | AGAATCACCAGCAGCAAGTGTCC      | TCCTGAACCCACTTCTGCTTGG       |
| <i>VEGF</i>    | TGCAGATTATGCGGATCAAACC       | TGCATTACATTGTGTTGTGCTGTAG    |
| <i>CYP19A1</i> | GACGCAGGATTTCCACAGAAGAG      | ATGGTGTCAGGAGCTGCGATCA       |
| <i>GAPDH</i>   | TGTTGCCATCAATGACCCCTT        | CTCCACGACGTACTIONCAGCG       |

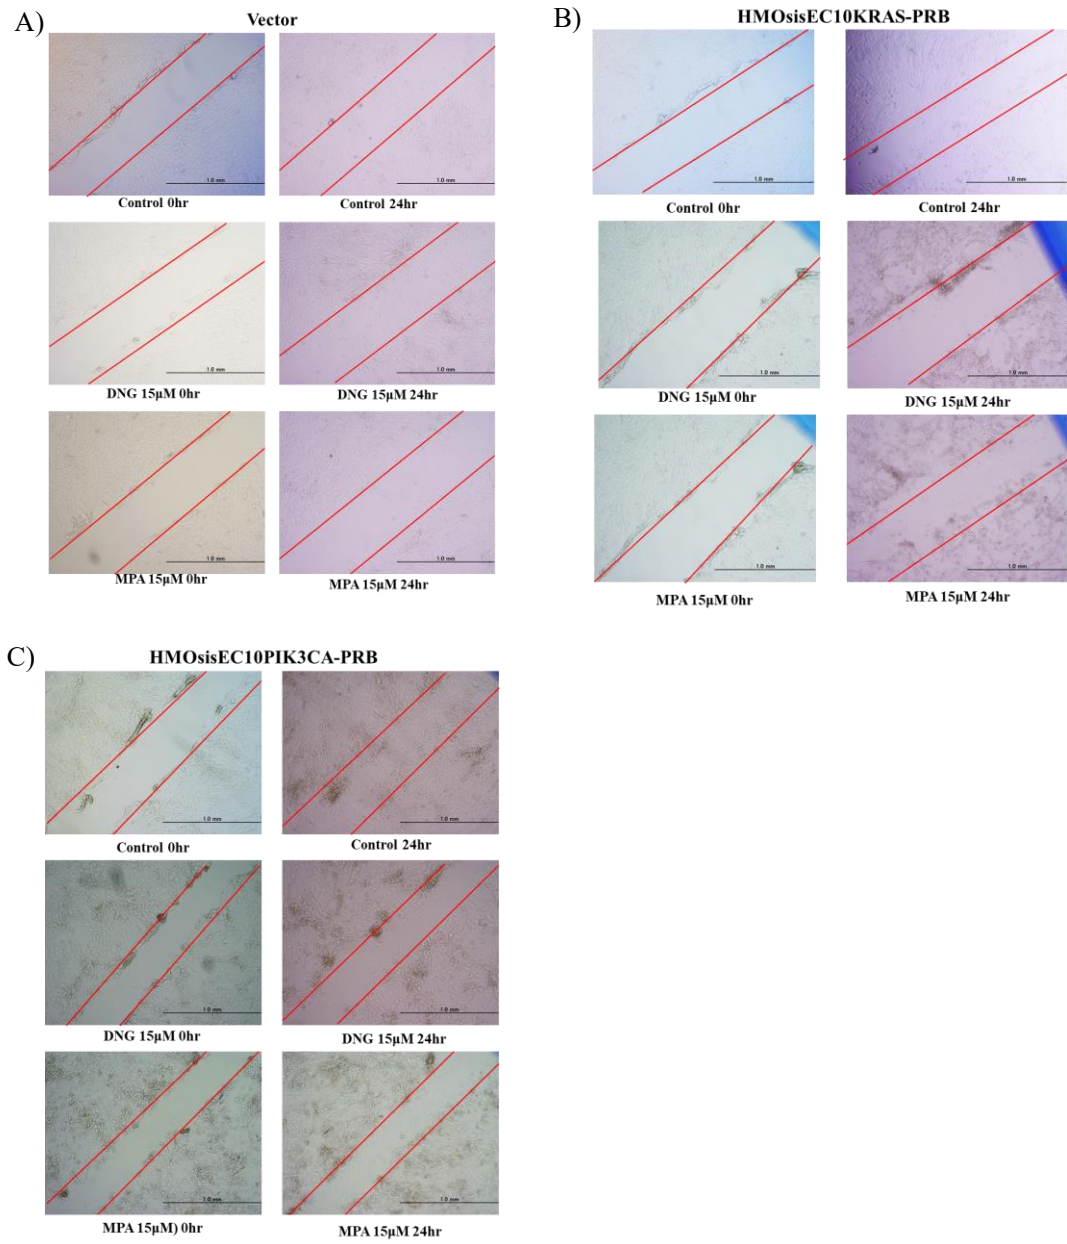

Figure S1. Presentative fields of migration assay at 200× magnification.

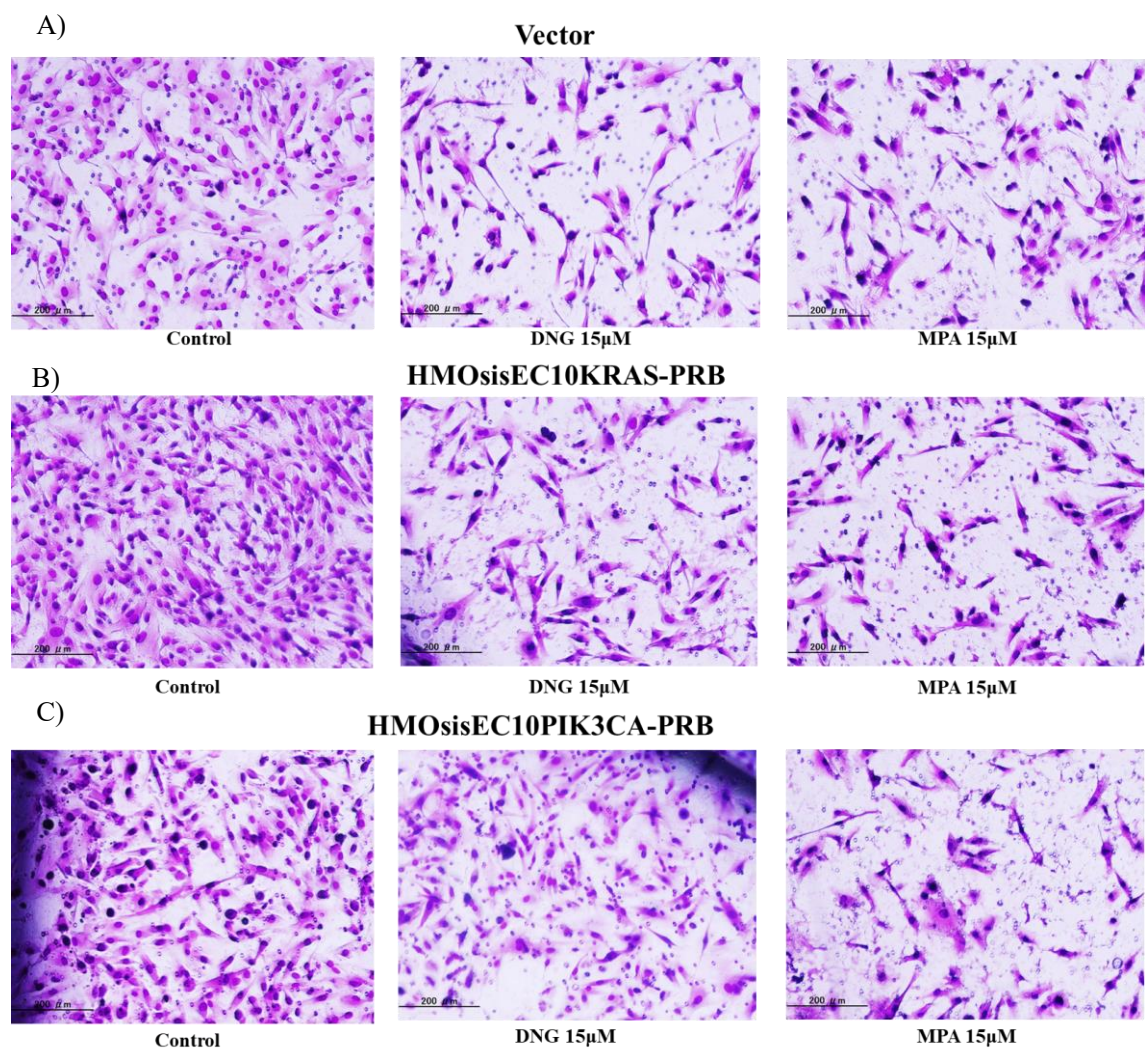

Figure S2. Presentative fields of invasion assay at 200× magnification.
